# Supplementary material for: Identification of plasma microRNAs as a biomarker of sporadic Amyotrophic Lateral Sclerosis
Source: PubMed Central journal article supplement (PMC4619470; doi:10.1186/s13041-015-0161-7), 2015-10-24

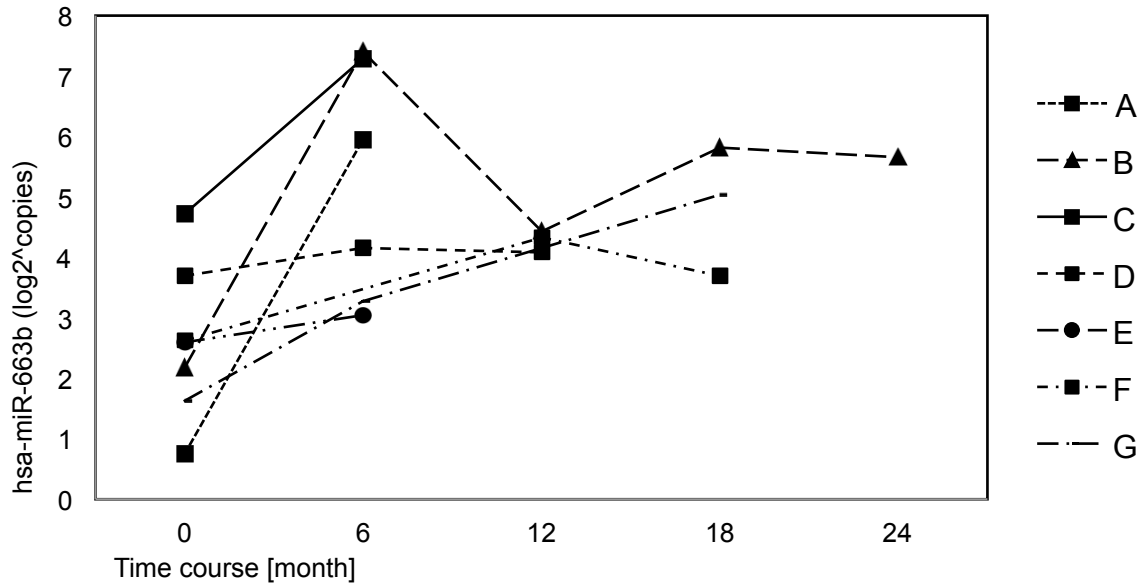

Supplement: 13041_2015_161_MOESM1_ESM.pdf [file 13041_2015_161_MOESM1_ESM.pdf]
